# Supplementary material for: Floral variation and environmental heterogeneity in a tristylous clonal aquatic of the Pantanal wetlands of Brazil
Source: Oxford University Press journal article supplement (doi:10.1093/aob/mcu181), 2014-09-01
Supplement: mcu181_Supplementary_Data.zip [file mcu181_Supplementary_Data.zip]

## SUPPLEMENTARY DATA

Table S1. Floral traits and insect visitors sampled among 34 populations of *Eichhornia azurea* among the four flood classes defined by height and duration (LS = Low-Short, MM = Medium-Medium, ML = Medium-Long, HL = High-Long) in the Pantanal wetlands, Brazil.

| Sub-region    | Flood class | Population |            |             | Data collected     |          |        |                 |
|---------------|-------------|------------|------------|-------------|--------------------|----------|--------|-----------------|
|               |             | #          | Size       | Structure   | Style and filament | Perianth | Pollen | Floral visitors |
| Nabileque     |             |            |            |             |                    |          |        |                 |
|               | LS          | 1          | 1_25       | Monomorphic | X                  | X        |        |                 |
|               | LS          | 2          | 51-100     | Trimorphic  | X                  | X        | X      |                 |
|               | LS          | 10         | 1_25       | Trimorphic  | X                  | X        | X      | X               |
|               | LS          | 14         | 101-200    | Trimorphic  | X                  | X        | X      | X               |
|               | LS          | 15         | 101-200    | Trimorphic  | X                  |          | X      |                 |
|               | LS          | 17         | 201-500    | Trimorphic  | X                  | X        | X      | X               |
|               | LS          | 18         | 201-500    | Trimorphic  | X                  | X        |        | X               |
|               | LS          | 20         | 501-1000   | Trimorphic  | X                  | X        | X      |                 |
| Aquidauana    |             |            |            |             |                    |          |        |                 |
|               | LS          | 23         | 101-200    | Trimorphic  | X                  | X        | X      | X               |
|               | LS          | 24         | 201-500    | Trimorphic  | X                  | X        | X      | X               |
|               | MM          | 46         | 51-100     | Trimorphic  | X                  | X        | X      |                 |
|               | ML          | 47         | 51-100     | Trimorphic  | X                  | X        | X      | X               |
|               | ML          | 48         | 51-100     | Trimorphic  | X                  | X        | X      | X               |
| Miranda       |             |            |            |             |                    |          |        |                 |
|               | ML          | 54         | 101-200    | Trimorphic  | X                  | X        | X      |                 |
|               | ML          | 55         | 101-200    | Trimorphic  | X                  | X        | X      |                 |
|               | ML          | 56         | 101-200    | Trimorphic  | X                  | X        | X      |                 |
|               | ML          | 57         | 101-200    | Trimorphic  | X                  | X        | X      |                 |
|               | ML          | 58         | 101-200    | Trimorphic  | X                  | X        | X      |                 |
|               | ML          | 60         | 201-500    | Trimorphic  | X                  |          |        |                 |
|               | ML          | 61         | 1000-10000 | Trimorphic  | X                  | X        | X      | X               |
| Nhecolândia   |             |            |            |             |                    |          |        |                 |
|               | MM          | 29         | 501-1000   | Dimorphic   | X                  |          |        |                 |
|               | MM          | 33         | 201-500    | Trimorphic  | X                  | X        | X      |                 |
|               | MM          | 57         | 51-100     | Trimorphic  | X                  | X        | X      |                 |
| Leque Taquari |             |            |            |             |                    |          |        |                 |
|               | LS          | 4          | 1_25       | Monomorphic | X                  |          | X      | X               |
|               | LS          | 5          | 51-100     | Monomorphic | X                  |          | X      | X               |
|               | LS          | 9          | 1_25       | Dimorphic   | X                  |          | X      |                 |
|               | LS          | 26         | 51-100     | Trimorphic  | X                  | X        | X      | X               |
|               | LS          | 27         | 51-100     | Trimorphic  | X                  | X        | X      | X               |
| Paraguai      |             |            |            |             |                    |          |        |                 |
|               | HL          | 64         | 1000-10000 | Trimorphic  | X                  | X        |        | X               |
|               | HL          | 65         | 1000-10000 | Trimorphic  | X                  | X        |        |                 |
|               | HL          | 66         | 1000-10000 | Trimorphic  | X                  | X        |        |                 |
|               | HL          | 67         | 1000-10000 | Trimorphic  | X                  | X        |        | X               |
| Rio Taquari   |             |            |            |             |                    |          |        |                 |
|               | HL          | 72         | 1000-10000 | Trimorphic  | X                  |          |        | X               |
| Cuiabá        |             |            |            |             |                    |          |        |                 |
|               | HL          | 73         | 1000-10000 | Trimorphic  | X                  | X        |        |                 |
| 8             | 4           | 34         |            |             | 34                 | 27       | 24     | 16              |

Table S2. The 73 sampled populations of *Eichhornia azurea* in four classes of flood height-duration in sub-regions of the Pantanal wetlands, Brazil, and their morph structures (mono = monomorphic, di = dimorphic, tri = trimorphic), size classes, numbers of sampled inflorescences (*n*), style morph frequencies, rarest morphs ( $\leq 15\%$ ) and proportional sampling efforts. *P* values generated via *G*-test with Bonferroni correction are used to determine the isoplethy.

| Flood class   | Sub-region    | Population |           |          |      | Style morph |      |       | Rare style morph | Effort (%) | P            | Isoplethy |
|---------------|---------------|------------|-----------|----------|------|-------------|------|-------|------------------|------------|--------------|-----------|
|               |               | #          | Structure | Size     | n    | Long        | Mid  | Short |                  |            |              |           |
| Low-Short     |               |            |           |          |      |             |      |       |                  |            |              |           |
|               | Nabileque     | 1          | mono      | 01-25    | 2    | -           | -    | 1.00  |                  | 0.08       | -            | no        |
|               | Nabileque     | 2          | mono      | 01-25    | 1    | -           | -    | 1.00  |                  | 0.04       | -            | no        |
|               | Aquidauana    | 3          | mono      | 01-25    | 1    | 1.00        | -    | -     |                  | 0.04       | -            | no        |
|               | Leque Taquari | 4          | mono      | 01-25    | 19   | -           | 1.00 | -     |                  | 0.76       | -            | no        |
|               | Leque Taquari | 5          | mono      | 51-100   | 34   | -           | 1.00 | -     |                  | 0.34       | -            | no        |
|               | Nabileque     | 6          | mono      | 01-25    | 2    | -           | -    | 1.00  |                  | 0.08       | -            | no        |
|               | Nabileque     | 7          | mono      | 26-50    | 36   | -           | 1.00 | -     |                  | 0.72       | -            | no        |
|               | Nabileque     | 8          | di        | 101-200  | 135  | 0.53        | -    | 0.47  |                  | 0.68       | -            | no        |
|               | Aquidauana    | 9          | di        | 201-500  | 17   | 0.35        | -    | 0.65  |                  | 0.03       | -            | no        |
|               | Nhecolândia   | 10         | di        | 26-50    | 35   | 0.03        | -    | 0.97  | L                | 0.70       | -            | no        |
|               | Leque Taquari | 11         | di        | 01_25    | 2    | 0.50        | -    | 0.50  |                  | 0.08       | -            | no        |
|               | Nabileque     | 12         | tri       | 01-25    | 19   | 0.11        | 0.32 | 0.58  | L                | 0.76       | <b>0.031</b> | no        |
|               | Nabileque     | 13         | tri       | 051-100  | 62   | 0.08        | 0.23 | 0.69  | L                | 0.62       | <b>0.000</b> | no        |
|               | Nabileque     | 14         | tri       | 101-200  | 103  | 0.55        | 0.14 | 0.31  | M                | 0.52       | <b>0.000</b> | no        |
|               | Nabileque     | 15         | tri       | 101-200  | 82   | 0.30        | 0.41 | 0.28  |                  | 0.41       | 0.295        | yes       |
|               | Nabileque     | 16         | tri       | 201-500  | 248  | 0.22        | 0.38 | 0.40  |                  | 0.50       | <b>0.001</b> | no        |
|               | Nabileque     | 17         | tri       | 201-500  | 233  | 0.09        | 0.29 | 0.61  | L                | 0.47       | <b>0.000</b> | no        |
|               | Nabileque     | 18         | tri       | 201-500  | 250  | 0.27        | 0.22 | 0.51  |                  | 0.50       | <b>0.000</b> | no        |
|               | Nabileque     | 19         | tri       | 201-500  | 295  | 0.55        | 0.08 | 0.37  | M                | 0.59       | <b>0.000</b> | no        |
|               | Nabileque     | 20         | tri       | 501-1000 | 367  | 0.40        | 0.31 | 0.29  |                  | 0.37       | <b>0.031</b> | no        |
|               | Nabileque     | 21         | tri       | 51-100   | 63   | 0.59        | 0.29 | 0.13  | S                | 0.63       | <b>0.000</b> | no        |
|               | Aquidauana    | 22         | tri       | 101-200  | 108  | 0.45        | 0.16 | 0.39  | M*               | 0.54       | <b>0.000</b> | no        |
|               | Aquidauana    | 23         | tri       | 101-200  | 133  | 0.32        | 0.27 | 0.41  |                  | 0.67       | 0.158        | yes       |
|               | Aquidauana    | 24         | tri       | 201-500  | 140  | 0.12        | 0.18 | 0.70  | L                | 0.28       | <b>0.000</b> | no        |
|               | Aquidauana    | 25         | tri       | 201-500  | 125  | 0.22        | 0.38 | 0.39  |                  | 0.25       | <b>0.027</b> | no        |
|               | Leque Taquari | 26         | tri       | 051-100  | 62   | 0.56        | 0.13 | 0.31  | M                | 0.62       | <b>0.000</b> | no        |
|               | Leque Taquari | 27         | tri       | 051-100  | 11   | 0.55        | 0.09 | 0.36  |                  | 0.11       | 0.135        | yes       |
| Medium-Medium |               |            |           |          |      |             |      |       |                  |            |              |           |
|               | Nhecolândia   | 28         | di        | 101-200  | 10   | -           | 0.70 | 0.30  |                  | 0.05       | -            | no        |
|               | Nhecolândia   | 29         | di        | 501-1000 | 50   | 0.50        | -    | 0.50  |                  | 0.05       | -            | no        |
|               | Nhecolândia   | 30         | tri       | 26-50    | 27   | 0.52        | 0.15 | 0.33  | M                | 0.54       | 0.053        | yes       |
|               | Nhecolândia   | 31         | tri       | 101-200  | 37   | 0.35        | 0.27 | 0.38  |                  | 0.19       | 0.730        | yes       |
|               | Nhecolândia   | 32         | tri       | 101-200  | 77   | 0.30        | 0.32 | 0.38  |                  | 0.39       | 0.697        | yes       |
|               | Nhecolândia   | 33         | tri       | 201-500  | 286  | 0.34        | 0.44 | 0.22  |                  | 0.57       | <b>0.000</b> | no        |
|               | Nhecolândia   | 34         | tri       | 201-500  | 129  | 0.35        | 0.27 | 0.38  |                  | 0.26       | 0.289        | yes       |
|               | Nhecolândia   | 35         | tri       | 201-500  | 133  | 0.29        | 0.35 | 0.37  |                  | 0.27       | 0.475        | yes       |
|               | Nhecolândia   | 36         | tri       | 501-1000 | 274  | 0.40        | 0.29 | 0.31  |                  | 0.27       | 0.076        | yes       |
|               | Nhecolândia   | 37         | tri       | >1000    | 387  | 0.37        | 0.23 | 0.40  |                  | 0.39       | <b>0.000</b> | no        |
|               | Nhecolândia   | 38         | tri       | >1000    | 648  | 0.37        | 0.28 | 0.35  |                  | 0.65       | <b>0.006</b> | no        |
|               | Nhecolândia   | 39         | tri       | >1000    | 1000 | 0.37        | 0.26 | 0.38  |                  | 1.00       | <b>0.000</b> | no        |
|               | Nhecolândia   | 40         | tri       | >1000    | 280  | 0.36        | 0.29 | 0.35  |                  | 0.28       | 0.268        | yes       |
|               | Nhecolândia   | 41         | tri       | >1000    | 22   | 0.18        | 0.45 | 0.36  |                  | 0.02       | 0.253        | yes       |
|               | Nhecolândia   | 42         | tri       | 51-100   | 49   | 0.43        | 0.20 | 0.37  |                  | 0.49       | 0.120        | yes       |
|               | Nhecolândia   | 43         | tri       | 51-100   | 64   | 0.48        | 0.34 | 0.17  |                  | 0.64       | <b>0.007</b> | no        |
| Medium-Long   |               |            |           |          |      |             |      |       |                  |            |              |           |
|               | Miranda       | 44         | mono      | 01-25    | 1    | -           | -    | 1.00  |                  | 0.04       | -            | no        |
|               | Miranda       | 45         | di        | 26-50    | 41   | 0.49        | -    | 0.51  |                  | 0.82       | -            | no        |

|            |    |     |         |     |      |      |      |    |      |              |     |
|------------|----|-----|---------|-----|------|------|------|----|------|--------------|-----|
| Aquidauana | 46 | tri | 51-100  | 55  | 0.18 | 0.13 | 0.69 | M  | 0.55 | <b>0.000</b> | no  |
| Aquidauana | 47 | tri | 51-100  | 62  | 0.58 | 0.26 | 0.16 |    | 0.62 | <b>0.000</b> | no  |
| Aquidauana | 48 | tri | 51-100  | 58  | 0.26 | 0.24 | 0.50 |    | 0.58 | <b>0.032</b> | no  |
| Aquidauana | 49 | tri | 51-100  | 48  | 0.50 | 0.02 | 0.48 | M  | 0.48 | <b>0.000</b> | no  |
| Miranda    | 50 | tri | 26-50   | 29  | 0.34 | 0.28 | 0.38 |    | 0.58 | 0.782        | yes |
| Miranda    | 51 | tri | 26-50   | 46  | 0.22 | 0.09 | 0.70 | M  | 0.92 | <b>0.000</b> | no  |
| Miranda    | 52 | tri | 051-100 | 85  | 0.19 | 0.35 | 0.46 |    | 0.85 | <b>0.006</b> | no  |
| Miranda†   | 53 | tri | 101-200 | 182 | 0.40 | 0.25 | 0.35 |    | 0.91 | <b>0.048</b> | no  |
| Miranda    | 54 | tri | 101-200 | 105 | 0.43 | 0.31 | 0.26 |    | 0.53 | 0.094        | yes |
| Miranda    | 55 | tri | 101-200 | 63  | 0.37 | 0.21 | 0.43 |    | 0.32 | 0.071        | yes |
| Miranda    | 56 | tri | 101-200 | 248 | 0.55 | 0.28 | 0.17 |    | 1.24 | <b>0.000</b> | no  |
| Miranda    | 57 | tri | 101-200 | 167 | 0.60 | 0.18 | 0.22 |    | 0.84 | <b>0.000</b> | no  |
| Miranda    | 58 | tri | 101-200 | 124 | 0.44 | 0.41 | 0.15 | S* | 0.62 | <b>0.000</b> | no  |
| Miranda    | 59 | tri | 201-500 | 343 | 0.45 | 0.27 | 0.29 |    | 0.69 | <b>0.000</b> | no  |
| Miranda†   | 60 | tri | 201-500 | 427 | 0.48 | 0.29 | 0.24 |    | 0.85 | <b>0.000</b> | no  |
| Miranda    | 61 | tri | >1000   | 792 | 0.29 | 0.32 | 0.39 |    | 0.79 | <b>0.001</b> | no  |

#### High-Long

|             |    |     |       |     |      |      |      |     |      |              |     |
|-------------|----|-----|-------|-----|------|------|------|-----|------|--------------|-----|
| Paraguai††  | 62 | di  | >1000 | 155 | 0.18 | 0.82 | -    |     | 0.16 | -            | no  |
| Paraguai††  | 63 | tri | >1000 | 145 | 0.46 | 0.34 | 0.20 |     | 0.15 | <b>0.001</b> | no  |
| Paraguai    | 64 | tri | >1000 | 66  | 0.79 | 0.12 | 0.09 | M   | 0.07 | <b>0.000</b> | no  |
| Paraguai    | 65 | tri | >1000 | 18  | 0.72 | 0.22 | 0.06 |     | 0.02 | <b>0.001</b> | no  |
| Paraguai    | 66 | tri | >1000 | 163 | 0.37 | 0.31 | 0.33 |     | 0.16 | 0.618        | yes |
| Paraguai    | 67 | tri | >1000 | 50  | 0.54 | 0.20 | 0.26 |     | 0.05 | <b>0.009</b> | no  |
| Paraguai    | 68 | tri | >1000 | 102 | 0.81 | 0.17 | 0.02 |     | 0.10 | <b>0.000</b> | no  |
| Paraguai    | 69 | tri | >1000 | 28  | 0.14 | 0.61 | 0.25 |     | 0.03 | <b>0.008</b> | no  |
| Paraguai    | 70 | tri | >1000 | 79  | 0.13 | 0.75 | 0.13 | S,L | 0.08 | <b>0.000</b> | no  |
| Paraguai    | 71 | tri | >1000 | 20  | 0.50 | 0.15 | 0.35 | M   | 0.02 | 0.135        | yes |
| Rio Taquari | 72 | tri | >1000 | 189 | 0.50 | 0.12 | 0.39 | M   | 0.19 | <b>0.000</b> | no  |
| Cuiabá      | 73 | tri | >1000 | 59  | 0.44 | 0.34 | 0.22 |     | 0.06 | 0.109        | yes |

\* Marginally close to 15%.

† Data from: Bueno, PAA. 2003. Relação de características morfológicas e implicações evolutivas em *Eichhornia azurea*, no Pantanal sulmatogrossense. *Dissertação de Mestrado*, Programa de Pós-Graduação em Ecologia e Conservação, Universidade Federal de Mato Grosso do Sul.

†† Data from: Baleeiro, P. 2006. Frequência de morfos heterostílicos em *Eichhornia azurea* no Sistema de Baías Caiçara, Cáceres-MT, Brasil. *Monografia de Graduação em Ciências Biológicas*, Universidade do Estado de Mato Grosso, UNEMAT, Brasil

Table S3. Perianth measurements of *Eichhornia azurea* flowers among style morphs and flood regimes. The acronyms correspond to: SD = standard deviation, CV = coefficient of variation, Min. = minimum, Max. = maximum,  $n$  = number of individuals, Pop ( $n$ ) = number of sampled populations. LS = Low-Short, MM = Medium-Medium, ML = Medium-Long, HL = High-Long.

| Perianth              | Style morph | Flood class | Mean | SD  | SE  | CV    | Min. | Max. | <i>n</i> | Pop ( <i>n</i> ) |
|-----------------------|-------------|-------------|------|-----|-----|-------|------|------|----------|------------------|
| Flower length         | L           | LS          | 46.9 | 4.6 | 0.5 | 0.097 | 33.0 | 56.0 | 79       | 14               |
|                       | M           |             | 46.4 | 5.6 | 0.6 | 0.121 | 29.4 | 56.4 | 91       |                  |
|                       | S           |             | 47.7 | 4.1 | 0.4 | 0.086 | 35.8 | 55.6 | 88       |                  |
|                       | L           | MM          | 42.4 | 7.1 | 1.4 | 0.167 | 27.0 | 54.0 | 25       | 3                |
|                       | M           |             | 42.7 | 4.1 | 0.8 | 0.095 | 34.6 | 51.0 | 25       |                  |
|                       | S           |             | 44.1 | 4.8 | 0.9 | 0.108 | 36.1 | 53.3 | 28       |                  |
|                       | L           | ML          | 37.6 | 5.9 | 0.5 | 0.157 | 13.8 | 49.3 | 158      | 9                |
|                       | M           |             | 36.4 | 5.6 | 0.5 | 0.154 | 21.3 | 46.3 | 113      |                  |
|                       | S           |             | 38.4 | 5.4 | 0.5 | 0.141 | 19.5 | 51.5 | 118      |                  |
|                       | L           | HL          | 48.6 | 2.5 | 0.5 | 0.052 | 44.3 | 55.5 | 22       | 5                |
|                       | M           |             | 47.1 | 2.6 | 0.8 | 0.056 | 43.0 | 52.1 | 12       |                  |
|                       | S           |             | 49.8 | 3.5 | 0.8 | 0.070 | 40.6 | 56.5 | 19       |                  |
|                       | L           | Total       | 41.4 | 7.1 | 0.4 | 0.172 | 13.8 | 56.0 | 284      | 31               |
|                       | M           |             | 40.6 | 7.1 | 0.5 | 0.175 | 21.3 | 56.4 | 241      |                  |
|                       | S           |             | 42.9 | 6.6 | 0.4 | 0.155 | 19.5 | 56.5 | 253      |                  |
| Petal width           | L           | LS          | 36.7 | 4.2 | 0.5 | 0.114 | 21.8 | 45.0 | 79       | 14               |
|                       | M           |             | 37.2 | 7.3 | 0.8 | 0.196 | 3.0  | 53.5 | 91       |                  |
|                       | S           |             | 37.6 | 4.9 | 0.5 | 0.130 | 25.2 | 49.2 | 88       |                  |
|                       | L           | MM          | 33.9 | 7.6 | 1.5 | 0.223 | 21.0 | 45.9 | 25       | 3                |
|                       | M           |             | 31.4 | 6.6 | 1.3 | 0.211 | 23.4 | 45.5 | 25       |                  |
|                       | S           |             | 33.3 | 6.3 | 1.2 | 0.189 | 21.0 | 47.1 | 28       |                  |
|                       | L           | ML          | 27.6 | 5.3 | 0.4 | 0.193 | 5.1  | 41.1 | 158      | 9                |
|                       | M           |             | 27.4 | 5.9 | 0.6 | 0.217 | 0.3  | 39.2 | 113      |                  |
|                       | S           |             | 28.6 | 5.2 | 0.5 | 0.181 | 14.0 | 47.5 | 118      |                  |
|                       | L           | HL          | 38.8 | 4.4 | 0.9 | 0.113 | 31.1 | 48.1 | 22       | 5                |
|                       | M           |             | 35.4 | 3.2 | 0.9 | 0.090 | 31.0 | 41.7 | 12       |                  |
|                       | S           |             | 39.3 | 5.1 | 1.2 | 0.129 | 31.4 | 50.9 | 19       |                  |
|                       | L           | Total       | 31.5 | 6.9 | 0.4 | 0.220 | 5.1  | 48.1 | 284      | 31               |
|                       | M           |             | 31.1 | 7.7 | 0.5 | 0.247 | 0.3  | 53.5 | 241      |                  |
|                       | S           |             | 32.8 | 6.8 | 0.4 | 0.208 | 14.0 | 50.9 | 253      |                  |
| Base of corolla width | L           | LS          | 3.4  | 0.5 | 0.1 | 0.161 | 1.8  | 4.4  | 79       | 14               |
|                       | M           |             | 3.3  | 0.5 | 0.0 | 0.141 | 2.2  | 4.4  | 91       |                  |
|                       | S           |             | 3.3  | 0.5 | 0.1 | 0.147 | 2.2  | 4.3  | 88       |                  |
|                       | L           | MM          | 2.9  | 0.3 | 0.1 | 0.112 | 2.5  | 3.5  | 25       | 3                |
|                       | M           |             | 3.0  | 0.5 | 0.1 | 0.167 | 1.6  | 3.8  | 25       |                  |
|                       | S           |             | 3.0  | 0.4 | 0.1 | 0.141 | 2.1  | 3.7  | 28       |                  |
|                       | L           | ML          | 2.9  | 0.5 | 0.0 | 0.184 | 1.6  | 4.4  | 158      | 9                |
|                       | M           |             | 2.8  | 0.5 | 0.0 | 0.174 | 1.2  | 4.7  | 113      |                  |
|                       | S           |             | 2.9  | 0.5 | 0.0 | 0.176 | 1.5  | 4.0  | 118      |                  |
|                       | L           | HL          | 3.5  | 0.4 | 0.1 | 0.111 | 2.7  | 4.0  | 22       | 5                |
|                       | M           |             | 3.7  | 0.4 | 0.1 | 0.118 | 3.0  | 4.8  | 12       |                  |
|                       | S           |             | 3.7  | 0.5 | 0.1 | 0.131 | 3.0  | 4.8  | 19       |                  |
|                       | L           | Total       | 3.1  | 0.6 | 0.0 | 0.185 | 1.6  | 4.4  | 284      | 31               |
|                       | M           |             | 3.0  | 0.5 | 0.0 | 0.178 | 1.2  | 4.8  | 241      |                  |
|                       | S           |             | 3.1  | 0.6 | 0.0 | 0.179 | 1.5  | 4.8  | 253      |                  |

|                  |   |    |            |            |            |              |            |             |            |           |
|------------------|---|----|------------|------------|------------|--------------|------------|-------------|------------|-----------|
| Corolla aperture | L |    | 10.2       | 1.6        | 0.2        | 0.154        | 4.5        | 13.5        | 79         | 14        |
|                  | M | LS | 10.4       | 1.6        | 0.2        | 0.154        | 4.4        | 14.6        | 91         |           |
|                  | S |    | 10.3       | 1.5        | 0.2        | 0.148        | 5.2        | 14.3        | 88         |           |
|                  | L |    | 9.3        | 1.8        | 0.4        | 0.193        | 6.6        | 13.6        | 25         | 3         |
|                  | M | MM | 8.5        | 1.6        | 0.3        | 0.190        | 5.1        | 11.8        | 25         |           |
|                  | S |    | 9.5        | 1.4        | 0.3        | 0.146        | 6.9        | 11.6        | 28         |           |
|                  | L |    | 7.5        | 2.2        | 0.2        | 0.289        | 2.2        | 13.2        | 158        | 9         |
|                  | M | ML | 7.9        | 2.1        | 0.2        | 0.266        | 2.8        | 13.5        | 113        |           |
|                  | S |    | 7.8        | 2.0        | 0.2        | 0.250        | 3.4        | 14.4        | 118        |           |
|                  | L |    | 8.6        | 1.3        | 0.3        | 0.150        | 7.1        | 12.0        | 22         | 5         |
|                  | M | HL | 8.2        | 1.1        | 0.3        | 0.133        | 7.0        | 10.4        | 12         |           |
|                  | S |    | 9.1        | 1.3        | 0.3        | 0.145        | 7.1        | 11.6        | 19         |           |
| <b>L</b>         |   |    | <b>8.5</b> | <b>2.3</b> | <b>0.1</b> | <b>0.268</b> | <b>2.2</b> | <b>13.6</b> | <b>284</b> | <b>31</b> |
| <b>M</b>         |   |    | <b>8.7</b> | <b>2.2</b> | <b>0.1</b> | <b>0.248</b> | <b>2.8</b> | <b>14.6</b> | <b>241</b> |           |
| <b>S</b>         |   |    | <b>8.9</b> | <b>2.1</b> | <b>0.1</b> | <b>0.231</b> | <b>3.4</b> | <b>14.4</b> | <b>253</b> |           |

Table S4. Results of two analyses of multiple contrasts: (1) comparing flower size of *Eichhornia azurea*, represented by the Principal Component 1 (70% of variance explained) of four flower measurements (see Figure S1), and flood regime, and (2) comparing sex-organ length of *E. azurea* among different flood regimes in the Pantanal wetlands, Brazil. LS = Low-Short, MM = Medium-Medium, ML = Medium-Long, HL = High-Long.

| Analysis         | Flood classes | Estimate | SE      | z-value | P r(> z )        |
|------------------|---------------|----------|---------|---------|------------------|
| Flower size      | <b>MM-LS</b>  | 1.17073  | 0.40596 | 2.884   | <b>0.020</b>     |
|                  | <b>ML-LS</b>  | 2.22747  | 0.32192 | 6.919   | <b>&lt;0.001</b> |
|                  | HL-LS         | -0.00494 | 0.3832  | -0.013  | 1.000            |
|                  | <b>ML-MM</b>  | 1.05673  | 0.42232 | 2.502   | <b>0.058</b>     |
|                  | <b>HL-MM</b>  | -1.17567 | 0.47071 | -2.498  | <b>0.059</b>     |
|                  | <b>HL-ML</b>  | -2.2324  | 0.40049 | -5.574  | <b>&lt;0.001</b> |
| Sex organ length | <b>MM-LS</b>  | 0.05006  | 0.3177  | 0.158   | 0.999            |
|                  | <b>ML-LS</b>  | -4.32251 | 0.1898  | -22.774 | <b>&lt;0.001</b> |
|                  | HL-LS         | 0.12583  | 0.25267 | 0.498   | 0.958            |
|                  | <b>ML-MM</b>  | -4.37256 | 0.31162 | -14.032 | <b>&lt;0.001</b> |
|                  | HL-MM         | 0.07578  | 0.35344 | 0.214   | 0.996            |
|                  | <b>HL-ML</b>  | 4.44834  | 0.24498 | 18.158  | <b>&lt;0.001</b> |

Table S5. Length measurements of sex organs associated with tristily in flowers of *Eichhornia azurea* sampled among distinct flood regimes in the Pantanal wetlands, Brazil. The acronyms correspond to: SD = standard deviation, CV = coefficient of variation, Min. = minimum, Max. = maximum,  $n$  = number of individuals, Pop ( $n$ ) = number of sampled populations. LS = Low-Short, MM = Medium-Medium, ML = Medium-Long, HL = High-Long.

| Flood class | Style morph | Sex organ        | Length (mm) |      |      |      |       |       |     | Pop ( $n$ ) |
|-------------|-------------|------------------|-------------|------|------|------|-------|-------|-----|-------------|
|             |             |                  | Mean        | SD   | SE   | CV   | Min.  | Max.  | $n$ |             |
| LS          | L           | Style            | 33.09       | 3.22 | 0.33 | 0.10 | 23.26 | 40.36 | 95  | 15          |
|             | M           | <i>l</i> -anther | 30.97       | 3.24 | 0.31 | 0.10 | 18.70 | 40.34 | 111 |             |
|             | S           | <i>l</i> -anther | 31.14       | 3.08 | 0.30 | 0.10 | 23.55 | 41.90 | 107 |             |
|             | M           | Style            | 22.31       | 1.59 | 0.15 | 0.07 | 16.44 | 25.72 | 111 |             |
|             | L           | <i>m</i> -anther | 22.28       | 2.54 | 0.26 | 0.11 | 16.12 | 34.67 | 95  |             |
|             | S           | <i>m</i> -anther | 21.86       | 2.24 | 0.22 | 0.10 | 14.23 | 28.21 | 107 |             |
|             | S           | Style            | 13.48       | 1.21 | 0.11 | 0.09 | 10.69 | 16.50 | 111 |             |
|             | L           | <i>s</i> -anther | 12.72       | 1.82 | 0.19 | 0.14 | 7.89  | 18.12 | 95  |             |
|             | M           | <i>s</i> -anther | 12.74       | 1.78 | 0.17 | 0.14 | 8.27  | 21.98 | 107 |             |
| MM          | L           | Style            | 32.95       | 2.73 | 0.55 | 0.08 | 25.17 | 38.84 | 25  | 3           |
|             | M           | <i>l</i> -anther | 30.66       | 3.07 | 0.61 | 0.10 | 23.40 | 37.00 | 25  |             |
|             | S           | <i>l</i> -anther | 30.03       | 3.12 | 0.59 | 0.10 | 20.39 | 37.50 | 28  |             |
|             | M           | Style            | 21.19       | 1.59 | 0.32 | 0.07 | 17.60 | 23.80 | 25  |             |
|             | L           | <i>m</i> -anther | 21.81       | 2.78 | 0.56 | 0.13 | 12.98 | 27.13 | 25  |             |
|             | S           | <i>m</i> -anther | 20.30       | 3.03 | 0.57 | 0.15 | 11.51 | 28.26 | 28  |             |
|             | S           | Style            | 12.95       | 1.13 | 0.21 | 0.09 | 9.88  | 16.41 | 28  |             |
|             | L           | <i>s</i> -anther | 12.40       | 2.19 | 0.44 | 0.18 | 6.27  | 18.88 | 25  |             |
|             | M           | <i>s</i> -anther | 11.99       | 1.92 | 0.38 | 0.16 | 8.00  | 15.86 | 25  |             |
| ML          | L           | Style            | 28.19       | 4.84 | 0.37 | 0.17 | 10.45 | 37.67 | 169 | 9           |
|             | M           | <i>l</i> -anther | 26.09       | 4.92 | 0.44 | 0.19 | 11.50 | 36.33 | 124 |             |
|             | S           | <i>l</i> -anther | 27.14       | 4.17 | 0.37 | 0.15 | 12.00 | 36.00 | 128 |             |
|             | M           | Style            | 20.50       | 2.64 | 0.24 | 0.13 | 10.06 | 24.67 | 124 |             |
|             | L           | <i>m</i> -anther | 19.79       | 2.95 | 0.23 | 0.15 | 10.11 | 29.50 | 169 |             |
|             | S           | <i>m</i> -anther | 19.12       | 3.17 | 0.28 | 0.17 | 8.61  | 29.60 | 128 |             |
|             | S           | Style            | 12.11       | 1.45 | 0.13 | 0.12 | 8.50  | 15.67 | 128 |             |
|             | L           | <i>s</i> -anther | 11.12       | 2.34 | 0.18 | 0.21 | 2.50  | 21.15 | 169 |             |
|             | M           | <i>s</i> -anther | 11.26       | 2.26 | 0.20 | 0.20 | 4.62  | 21.86 | 124 |             |
| HL          | L           | Style            | 34.05       | 1.50 | 0.20 | 0.04 | 31.17 | 37.46 | 54  | 6           |
|             | M           | <i>l</i> -anther | 30.91       | 2.11 | 0.34 | 0.07 | 26.35 | 35.98 | 38  |             |
|             | S           | <i>l</i> -anther | 31.27       | 2.09 | 0.28 | 0.07 | 26.88 | 36.21 | 57  |             |
|             | M           | Style            | 23.20       | 1.18 | 0.19 | 0.05 | 20.21 | 25.44 | 38  |             |
|             | L           | <i>m</i> -anther | 22.40       | 1.83 | 0.24 | 0.08 | 17.81 | 27.60 | 57  |             |
|             | S           | <i>m</i> -anther | 21.66       | 2.02 | 0.27 | 0.09 | 16.06 | 27.44 | 57  |             |
|             | S           | Style            | 13.88       | 1.20 | 0.16 | 0.09 | 10.34 | 15.90 | 57  |             |
|             | L           | <i>s</i> -anther | 13.01       | 1.60 | 0.22 | 0.12 | 9.28  | 17.00 | 54  |             |
|             | M           | <i>s</i> -anther | 13.11       | 1.64 | 0.27 | 0.13 | 9.58  | 17.72 | 38  |             |
| Total       | L           | Style            | 30.95       | 4.64 | 0.25 | 0.15 | 10.45 | 40.36 | 343 | 34          |
|             | M           | <i>l</i> -anther | 28.98       | 4.55 | 0.26 | 0.16 | 11.50 | 40.34 | 298 |             |
|             | S           | <i>l</i> -anther | 29.55       | 3.88 | 0.22 | 0.13 | 12.00 | 41.90 | 320 |             |
|             | M           | Style            | 21.59       | 2.26 | 0.13 | 0.10 | 10.06 | 25.72 | 298 |             |
|             | L           | <i>m</i> -anther | 21.10       | 2.94 | 0.16 | 0.14 | 10.11 | 34.67 | 343 |             |
|             | S           | <i>m</i> -anther | 20.65       | 2.95 | 0.17 | 0.14 | 8.61  | 29.60 | 298 |             |
|             | S           | Style            | 12.99       | 1.46 | 0.08 | 0.11 | 8.50  | 16.50 | 320 |             |
|             | L           | <i>s</i> -anther | 11.99       | 2.24 | 0.12 | 0.19 | 2.50  | 21.15 | 343 |             |
|             | M           | <i>s</i> -anther | 12.12       | 2.11 | 0.12 | 0.17 | 4.62  | 21.98 | 320 |             |

Table S6. Mean pollen size and pollen number per anther level among the three anther levels and style morphs of *Eichhornia azurea* and flood regimes in the Pantanal wetlands, Brazil. The acronyms correspond to: SD = standard deviation, SE = standard error, CV = coefficient of variation, Pop (n) = number of sampled populations. LS = Low-Short, MM = Medium-Medium, ML = Medium-Long.

| Flood class | Style morph | Anther height | Mean pollen size ( $\mu\text{m}$ ) |        |      |      |      | Mean pollen number per anther ( <i>n</i> ) |         |         |        |      | <i>n</i> of anthers | Pop ( <i>n</i> ) |
|-------------|-------------|---------------|------------------------------------|--------|------|------|------|--------------------------------------------|---------|---------|--------|------|---------------------|------------------|
|             |             |               | Mean                               | Median | SD   | SE   | CV   | Mean                                       | Median  | SD      | SE     | CV   |                     |                  |
| LS          | L-morph     | <i>m</i>      | 50.8                               | 50.0   | 4.79 | 0.52 | 0.09 | 12705.9                                    | 12000.0 | 5595.1  | 606.9  | 0.44 | 85                  | 13               |
|             |             | <i>s</i>      | 38.7                               | 39.2   | 2.98 | 0.32 | 0.08 | 19905.9                                    | 20000.0 | 7276.2  | 789.2  | 0.37 | 85                  |                  |
|             | M-morph     | <i>l</i>      | 64.1                               | 64.0   | 5.98 | 0.63 | 0.09 | 12711.1                                    | 10000.0 | 7376.3  | 777.5  | 0.58 | 90                  |                  |
|             |             | <i>s</i>      | 39.7                               | 40.0   | 4.10 | 0.43 | 0.10 | 19912.1                                    | 20000.0 | 7893.2  | 827.4  | 0.40 | 91                  |                  |
|             | S-morph     | <i>l</i>      | 63.9                               | 63.9   | 6.50 | 0.68 | 0.10 | 11282.6                                    | 10000.0 | 5874.7  | 612.5  | 0.52 | 92                  |                  |
|             |             | <i>m</i>      | 51.3                               | 50.9   | 3.70 | 0.39 | 0.07 | 16488.9                                    | 16000.0 | 6988.3  | 736.6  | 0.42 | 90                  |                  |
| MM          | L-morph     | <i>m</i>      | 50.7                               | 49.8   | 3.55 | 0.82 | 0.07 | 11737.5                                    | 8100.0  | 8772.0  | 2012.4 | 0.75 | 19                  | 2                |
|             |             | <i>s</i>      | 39.2                               | 39.0   | 3.26 | 0.75 | 0.08 | 21634.2                                    | 16200.0 | 12174.9 | 2793.1 | 0.56 | 19                  |                  |
|             | M-morph     | <i>l</i>      | 60.6                               | 62.2   | 6.42 | 1.34 | 0.11 | 13049.8                                    | 9537.5  | 10499.7 | 2189.3 | 0.80 | 23                  |                  |
|             |             | <i>s</i>      | 38.2                               | 38.4   | 2.26 | 0.47 | 0.06 | 17384.4                                    | 13500.0 | 11538.7 | 2406.0 | 0.66 | 23                  |                  |
|             | S-morph     | <i>l</i>      | 61.1                               | 60.9   | 4.65 | 1.07 | 0.08 | 11214.0                                    | 10500.0 | 5721.7  | 1312.6 | 0.51 | 19                  |                  |
|             |             | <i>m</i>      | 51.2                               | 51.2   | 5.23 | 1.20 | 0.10 | 16327.4                                    | 9041.7  | 14690.8 | 3370.3 | 0.90 | 19                  |                  |
| ML          | L-morph     | <i>m</i>      | 49.0                               | 49.2   | 5.34 | 0.50 | 0.11 | 13770.4                                    | 12000.0 | 8290.3  | 773.1  | 0.60 | 115                 | 9                |
|             |             | <i>s</i>      | 39.0                               | 39.0   | 3.72 | 0.35 | 0.10 | 17580.3                                    | 16000.0 | 10322.1 | 962.5  | 0.59 | 115                 |                  |
|             | M-morph     | <i>l</i>      | 56.4                               | 58.0   | 9.00 | 0.99 | 0.16 | 9584.6                                     | 8000.0  | 5787.1  | 635.2  | 0.60 | 83                  |                  |
|             |             | <i>s</i>      | 39.5                               | 39.2   | 5.04 | 0.55 | 0.13 | 15784.1                                    | 14000.0 | 9902.6  | 1074.1 | 0.63 | 85                  |                  |
|             | S-morph     | <i>l</i>      | 59.0                               | 58.9   | 6.49 | 0.72 | 0.11 | 13009.7                                    | 11250.0 | 9199.1  | 1015.9 | 0.71 | 82                  |                  |
|             |             | <i>m</i>      | 49.1                               | 50.0   | 4.45 | 0.50 | 0.09 | 18549.2                                    | 17750.0 | 11163.7 | 1248.1 | 0.60 | 80                  |                  |
| Total       | L-morph     | <i>m</i>      | 49.8                               | 49.8   | 5.06 | 0.34 | 0.10 | 13180.9                                    | 12000.0 | 7403.4  | 500.3  | 0.56 | 219                 | 24               |
|             |             | <i>s</i>      | 38.9                               | 39.0   | 3.40 | 0.23 | 0.09 | 18834.6                                    | 18000.0 | 9503.5  | 642.2  | 0.50 | 219                 |                  |
|             | M-morph     | <i>l</i>      | 60.5                               | 61.7   | 8.25 | 0.59 | 0.14 | 11426.9                                    | 10000.0 | 7339.7  | 524.3  | 0.64 | 196                 |                  |
|             |             | <i>s</i>      | 39.4                               | 39.4   | 4.38 | 0.31 | 0.11 | 17856.7                                    | 16000.0 | 9408.9  | 667.0  | 0.53 | 199                 |                  |
|             | S-morph     | <i>l</i>      | 61.5                               | 61.0   | 6.73 | 0.48 | 0.11 | 12009.7                                    | 10000.0 | 7474.6  | 538.0  | 0.62 | 193                 |                  |
|             |             | <i>m</i>      | 50.3                               | 50.0   | 4.31 | 0.31 | 0.09 | 17344.8                                    | 15750.0 | 9860.3  | 717.2  | 0.57 | 189                 |                  |
