# Supplementary material for: Floral variation and environmental heterogeneity in a tristylous clonal aquatic of the Pantanal wetlands of Brazil
Source: Oxford University Press journal article supplement (doi:10.1093/aob/mcu181), 2014-09-01

## SUPPLEMENTARY DATA

Figure 1. Measurements of flowers of *Eichhornia azurea*. Measures of the perianth: 1 petal width, 2 flower length, 3 base of corolla width, 4 perianth tube aperture. Measures of sex organs: L-morph, 5 L-style, 6-8 *m*-level anthers, 9-11 *s*-level anthers; M-morph, 12-14 *l*-level anthers, 15 M-style, 16-18 *s*-level anthers; S-morph, 19-21 *l*-level anthers, 22-24 *m*-level anthers, 25 S-style.

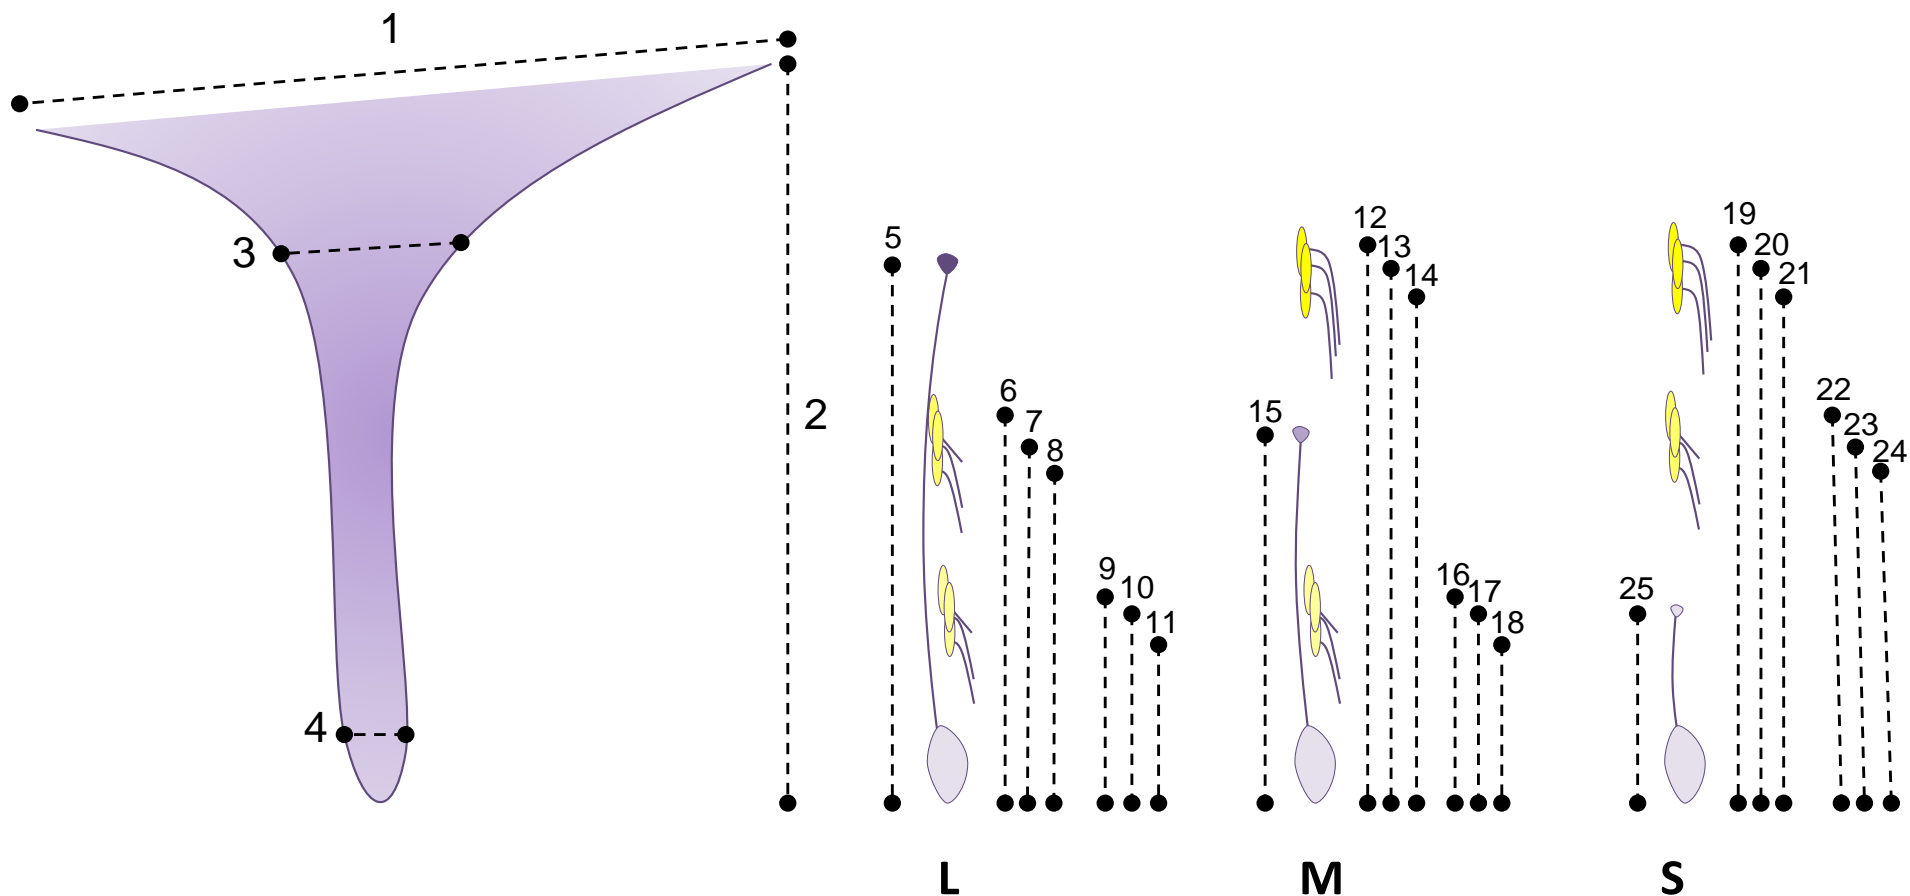

Figure S2. Pollen size (A) and pollen number (B) of tristylous *Eichhornia azurea* among anther levels and flood regimes in populations sampled from the Pantanal wetlands of Brazil. Each boxplot denotes a population and different colours the flood class. Horizontal scattered lines correspond to the grand mean of each variable (pollen size and pollen number) per anther level and flood region, independent of population.

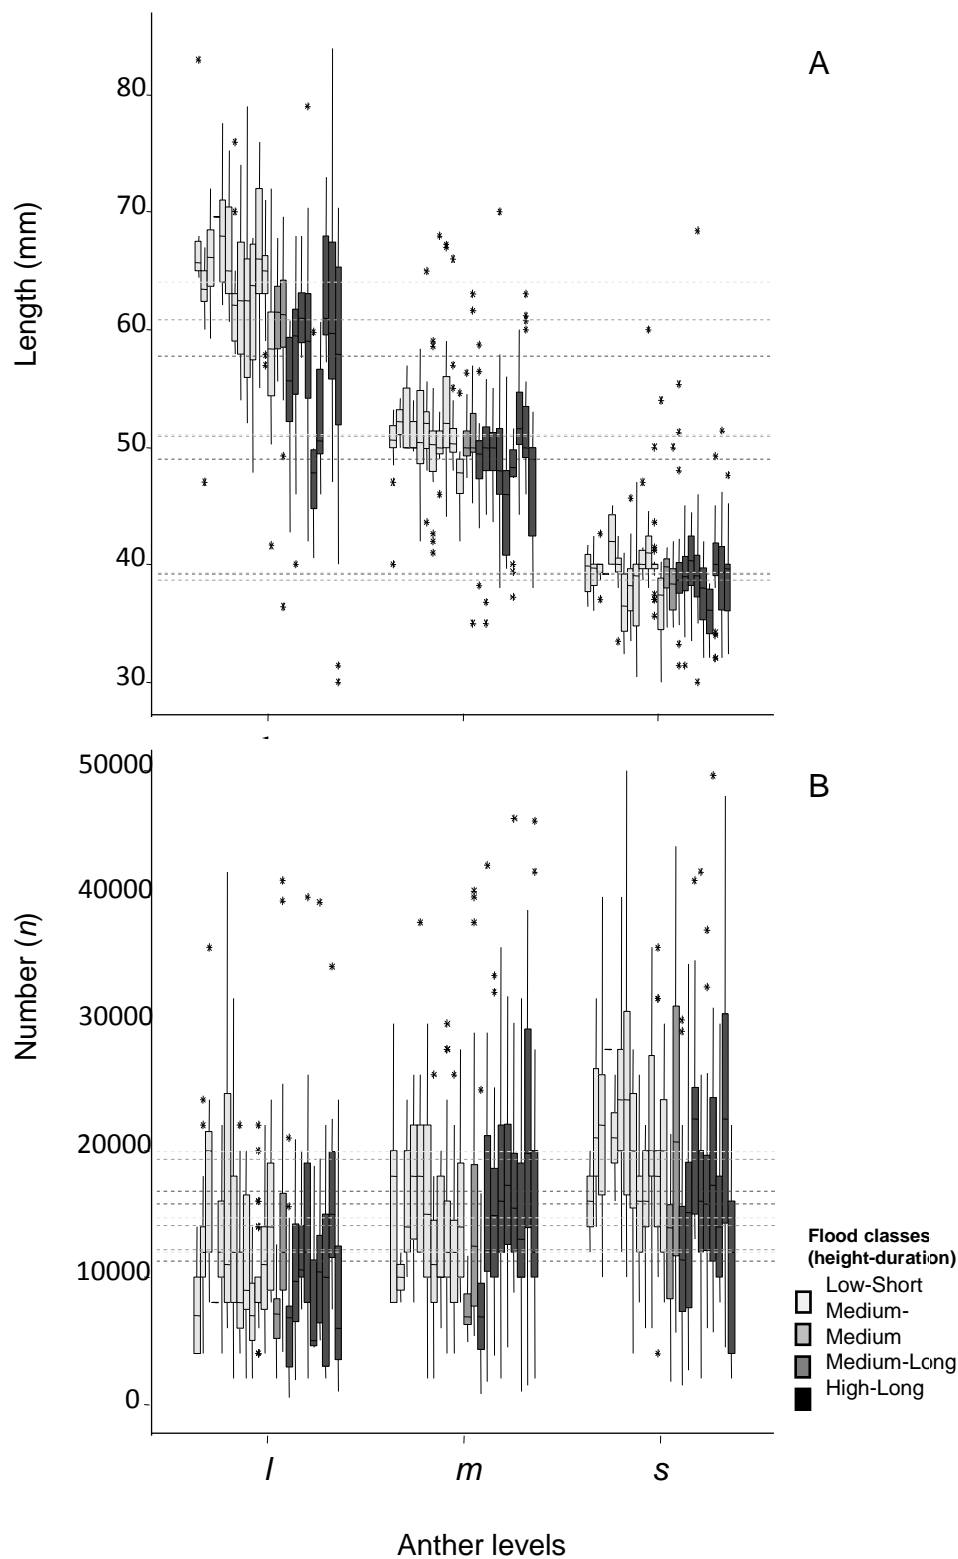

Supplement: mcu181_Supplementary_Data.zip [file mcu181_Supplementary_Data.zip]
